# Supplementary material for: Sucrose-templated interconnected meso/macro-porous 2D symmetric graphitic carbon networks as supports for α-Fe2O3 towards improved supercapacitive behavior
Source: Royal Society of Chemistry journal article supplement (doi:10.1039/d0ra02056g), 2020-01-01
Supplement: d0ra02056g1.pdf [file d0ra02056g1.pdf]

## Electronic Supplementary Information

### Sucrose templated interconnected meso/macroporous 2D symmetric graphitic carbon network as support for $\alpha$ - $\text{Fe}_2\text{O}_3$ towards an improved supercapacitive behavior

Jacob Otabil Bonsu<sup>a</sup>, Jeong In Han<sup>b\*</sup>

- Department of Energy and Materials Engineering, Dongguk University – Seoul, Pil-dong, Jung-gu, 04620, Seoul, South Korea.
- \*Department of Chemical and Biochemical Engineering, Dongguk University – Seoul, 04620, South Korea.

\*E-mail: hanji@dongguk.edu

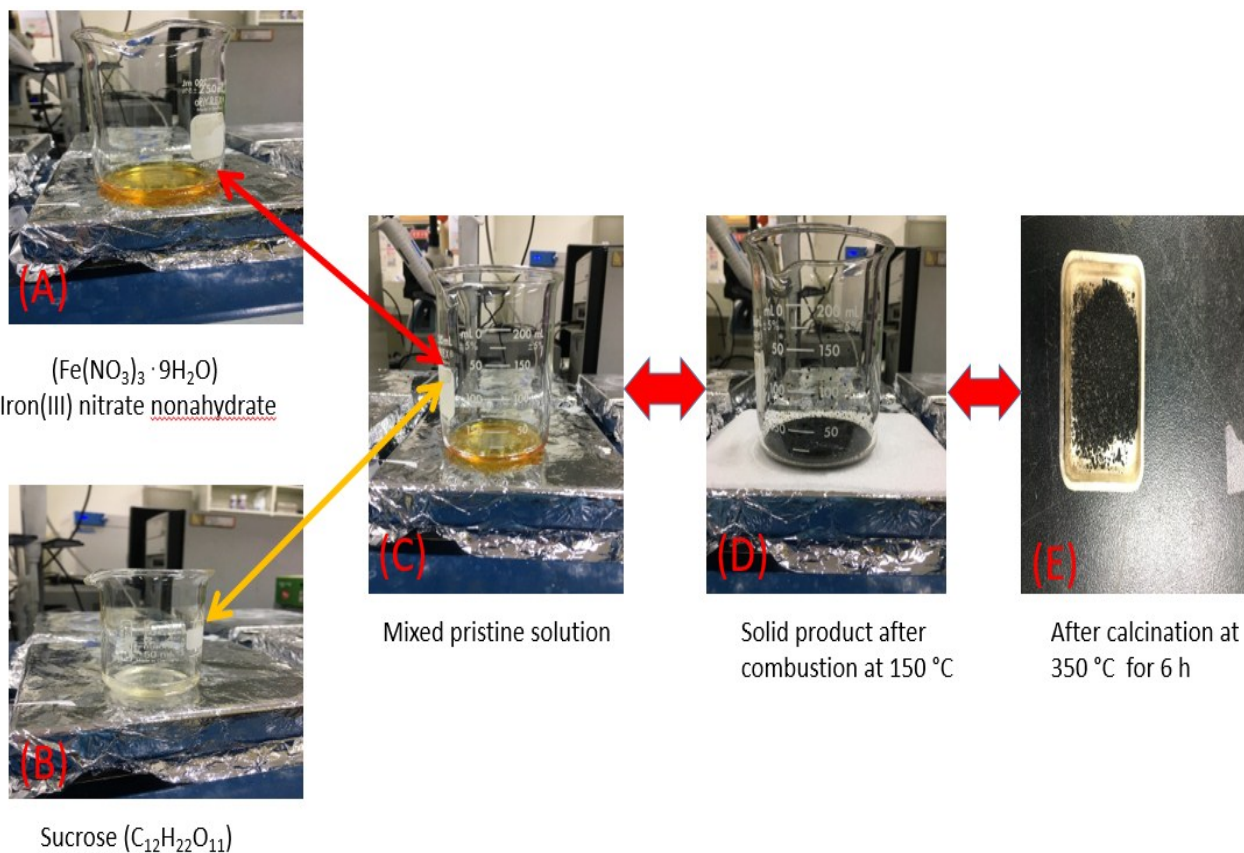

Figure S1: Synthesis procedure for 2D C@  $\alpha$ -Fe<sub>2</sub>O<sub>3</sub> and  $\alpha$ -Fe<sub>2</sub>O<sub>3</sub>.

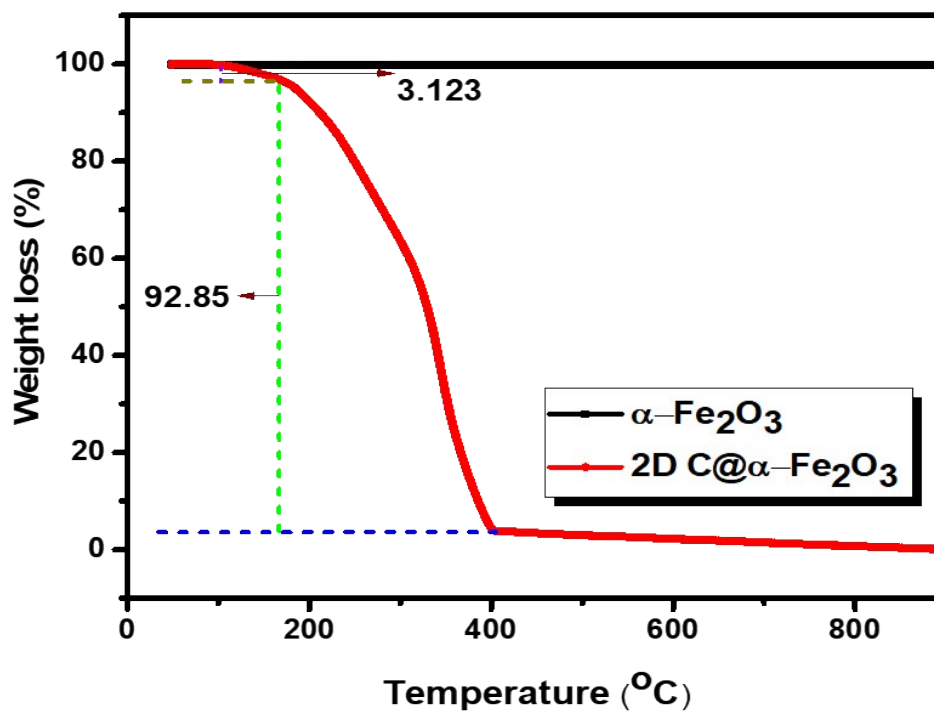

Figure S2: TGA Curves for 2D C@  $\alpha$ -Fe<sub>2</sub>O<sub>3</sub> and  $\alpha$ -Fe<sub>2</sub>O<sub>3</sub> at a constant heating rate of 10 °C min<sup>-1</sup>

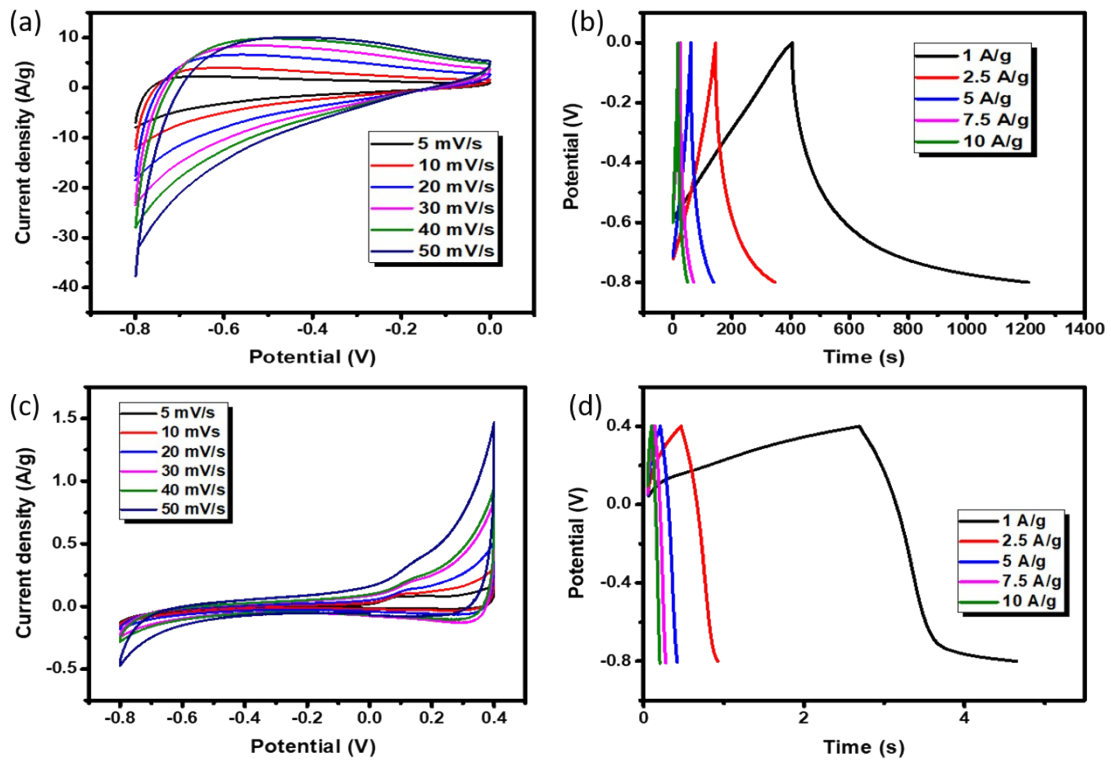

Figure S3: (a) CV for 2D C@  $\alpha$ -Fe<sub>2</sub>O<sub>3</sub> with potential window from -0.8~0; (b) GCD for 2D C@  $\alpha$ -Fe<sub>2</sub>O<sub>3</sub> with potential window from -0.8~0; (c) CV for Nickel foam; (d) CV for Nickel foam.

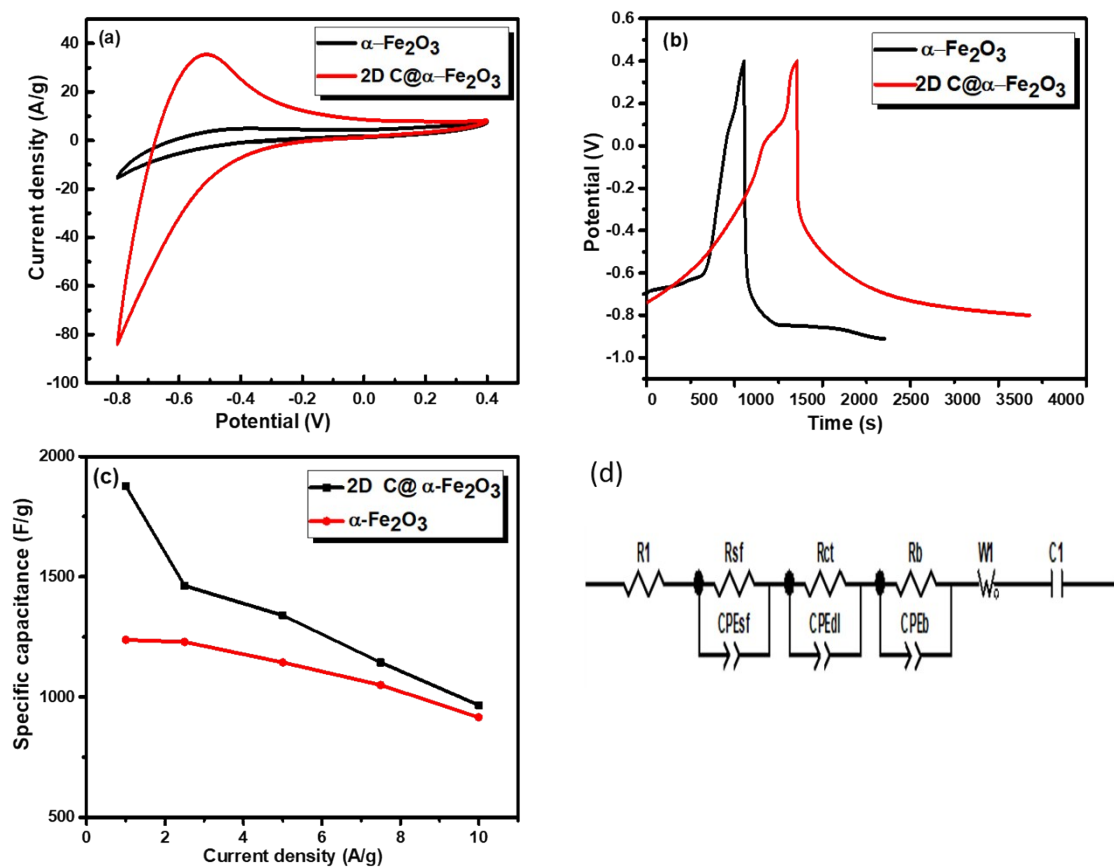

Figure S4: (a) (c) Comparison of CV curves for  $\alpha\text{-Fe}_2\text{O}_3$  and 2D C@  $\alpha\text{-Fe}_2\text{O}_3$  at 50 mV/s scan rate; (b) Comparison of GCD curves for 2D C@  $\alpha\text{-Fe}_2\text{O}_3$  and  $\alpha\text{-Fe}_2\text{O}_3$  at 1 A/g; (c) Plot of specific capacitance as a function of current density; (d) equivalent circuit for hematite.

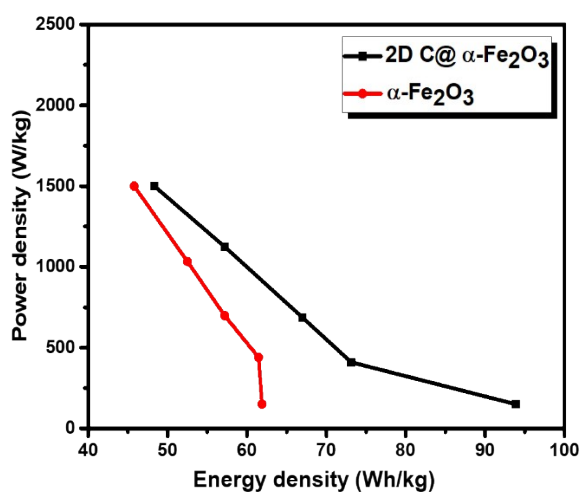

Figure S5: Comparative study for Ragone plot of 2D C@  $\alpha$ -Fe<sub>2</sub>O<sub>3</sub> and  $\alpha$ -Fe<sub>2</sub>O<sub>3</sub>.
